# Supplementary material for: Silica/MAO/(n-BuCp)2ZrCl2 catalyst: effect of support dehydroxylation temperature on the grafting of MAO and ethylene polymerization
Source: Royal Society of Chemistry journal article supplement (doi:10.1039/c5cy01285f), 2015-12-15
Supplement: c5cy01285f1.pdf [file c5cy01285f1.pdf]

## Electronic Supporting Information (ESI)

### **Silica/MAO/(n-BuCp)<sub>2</sub>ZrCl<sub>2</sub> Catalyst: Effect of Support Dehydroxylation Temperature on the Grafting of MAO and Ethylene Polymerization**

Muhammad Ahsan Bashir,<sup>a,c</sup> Régis M. Gauvin,<sup>b\*</sup> Laurent Delevoye,<sup>b</sup> Nicolas Merle,<sup>a</sup> Vincent Monteil,<sup>a</sup> Mostafa Taoufik,<sup>a</sup> Timothy F. L. McKenna,<sup>a\*</sup> Christophe Boisson<sup>a\*</sup>

<sup>a</sup>Université de Lyon, Univ Lyon 1, CPE Lyon, CNRS, UMR 5265, C2P2 (Chemistry, Catalysis, Polymers & Processes), Bat 308F, 43 Bd du 11 Novembre 1918, 69616 Villeurbanne, France

<sup>b</sup>UCCS (CNRS-UMR 8181), Université Lille Nord de France, USTL-ENSCL, 59652 Villeneuve d'Ascq, France

<sup>c</sup> Dutch Polymer Institute (DPI), P.O. Box 902, 5600 AX Eindhoven, the Netherlands.

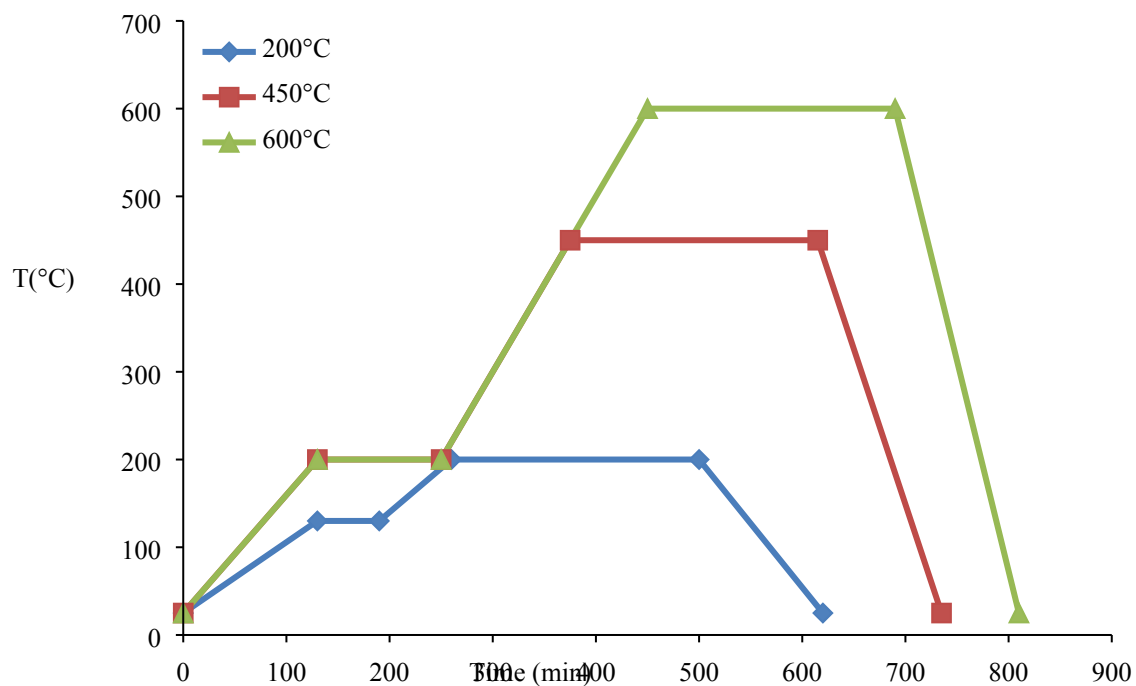

**Figure S1.** Temperature profiles used for silica dehydroxylation.

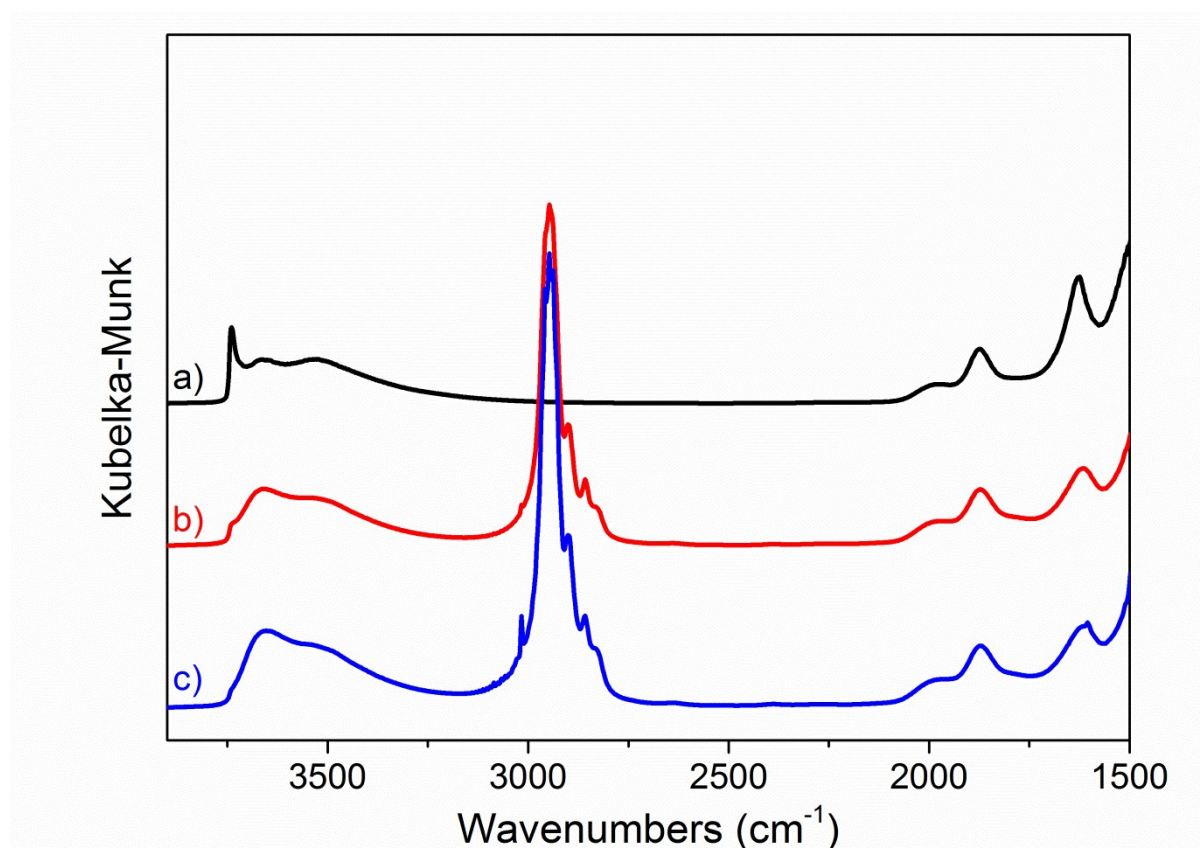

**Figure S2.** DRIFT spectra of silica-200°C (a), after reaction of MAO (SMAO-200°C) (b), after activation of (n-BuCp)<sub>2</sub>ZrCl<sub>2</sub> (n-BuCp-200°C) (c).

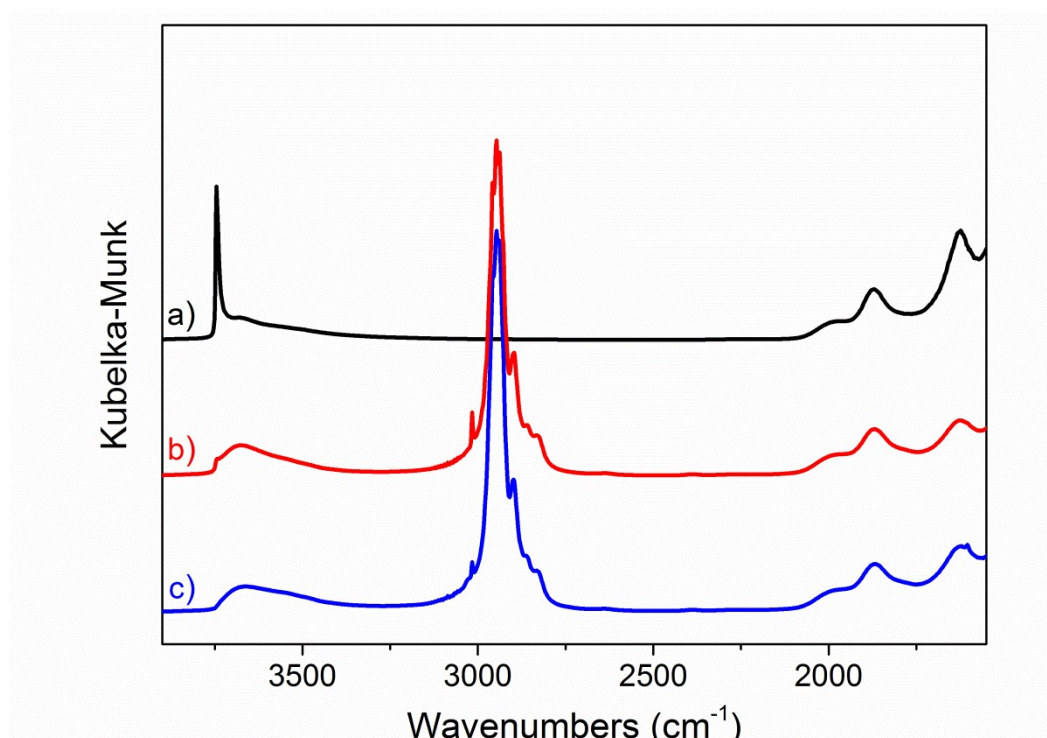

**Figure S3.** DRIFT spectra of silica-450°C (a), after reaction of MAO (SMAO-450°C) (b), after activation of  $(n\text{-BuCp})_2\text{ZrCl}_2$  (n-BuCp-450°C) (c).

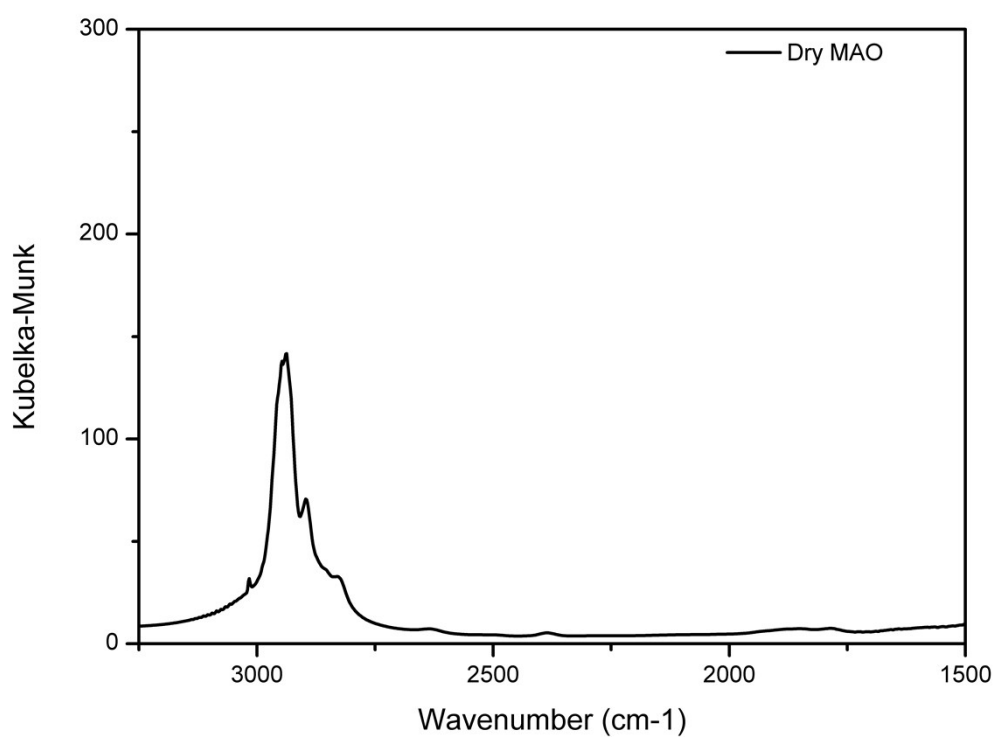

**Figure S4.** DRIFT spectrum of MAO dried at 100°C.

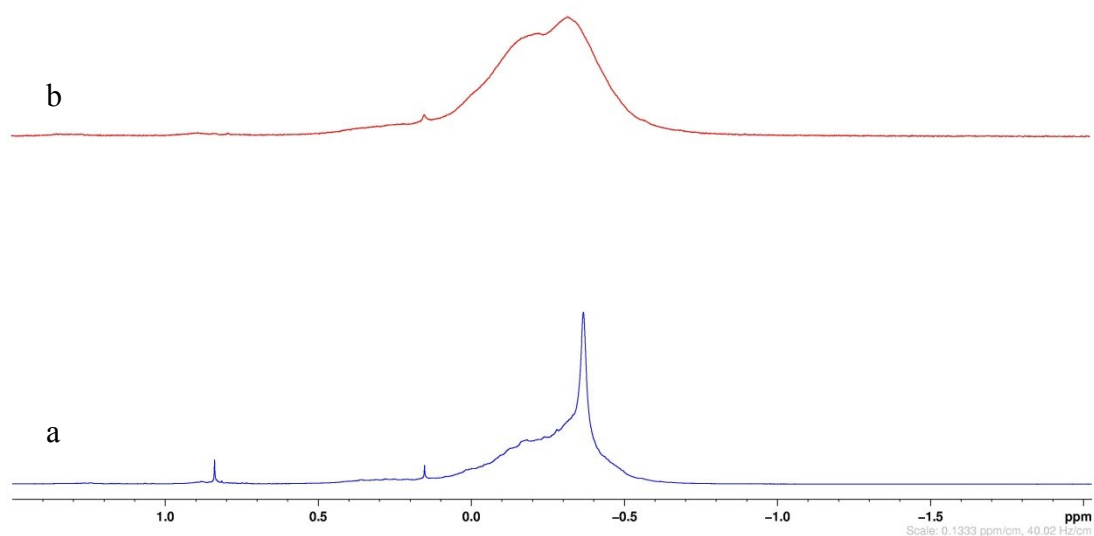

**Figure S5.**  $^1\text{H}$  proton NMR spectrum of 30wt%MAO solution (a) and dried MAO obtained by heating the 30wt% MAO solution at  $80^\circ\text{C}$  under vacuum for 4h (b). Benzene was used to as solvent for both the NMR spectra.

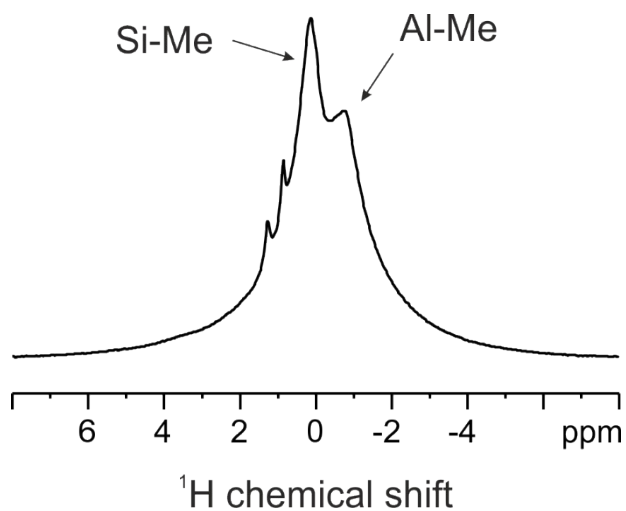

**Figure S6.**  $^1\text{H}$  MAS NMR spectrum of  $\text{AlMe}_3$  grafted on  $\text{SiO}_2\text{-600}$  (18.8 T, at spinning speed 20 kHz).

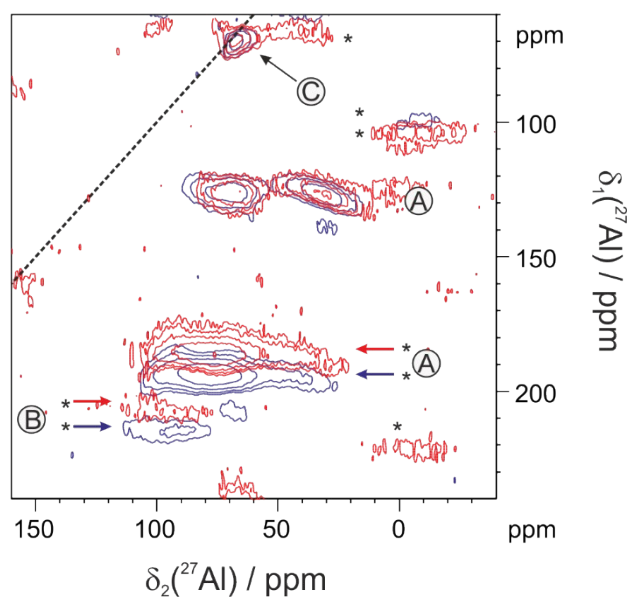

**Figure S7.**  $^{27}\text{Al}$  MQ MAS spectrum of MAO (18.8 T), at spinning speed 20 kHz (blue) and 18 kHz (red); asterisks designate spinning side bands.

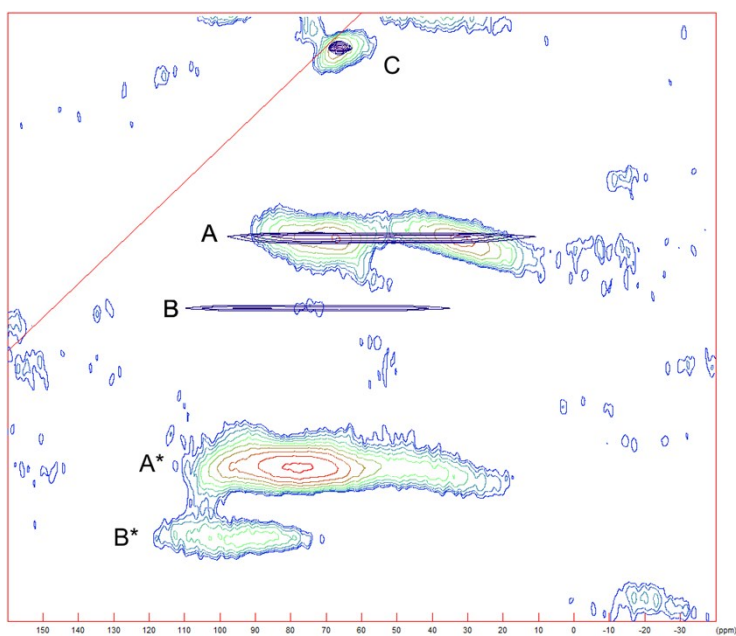

**Figure S8.**  $^{27}\text{Al}$  MQ MAS spectrum of MAO (18.8 T), at spinning speed 20 kHz with simulated CS resonances. A: CS=100 ppm,  $C_Q$ =18 MHz; B: CS=119 ppm,  $C_Q$ =18.6 MHz; C: CS=69 ppm,  $C_Q$ <5 MHz. Asterix designate spinning side bands.

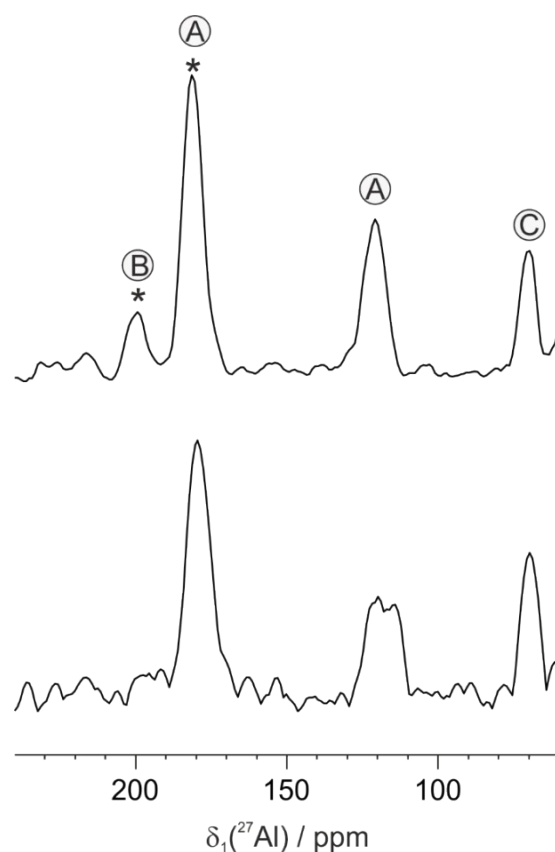

**Figure S9.**  $^{27}\text{Al}$  MQ MAS isotropic projections of dried MAO (top) and SMAO-600 (bottom) (18.8 T). Asterisks designate spinning side bands.

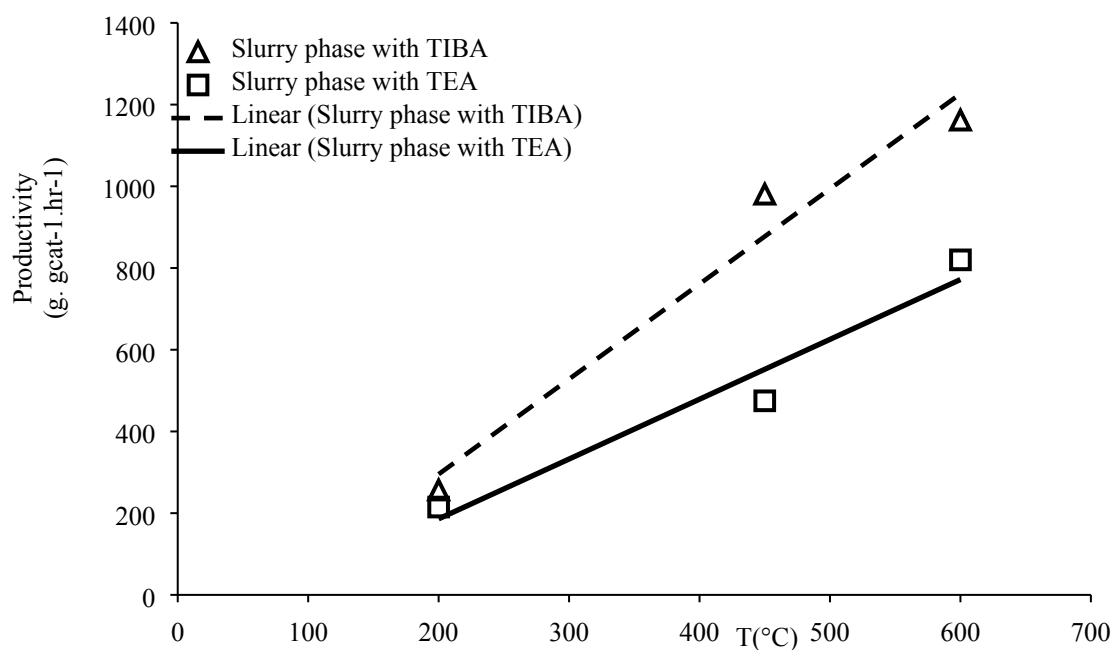

**Figure S10.** Average activities (or productivity) of the catalysts with different silica dehydroxylation temperatures in the presences of different scavenger in slurry polymerizations.

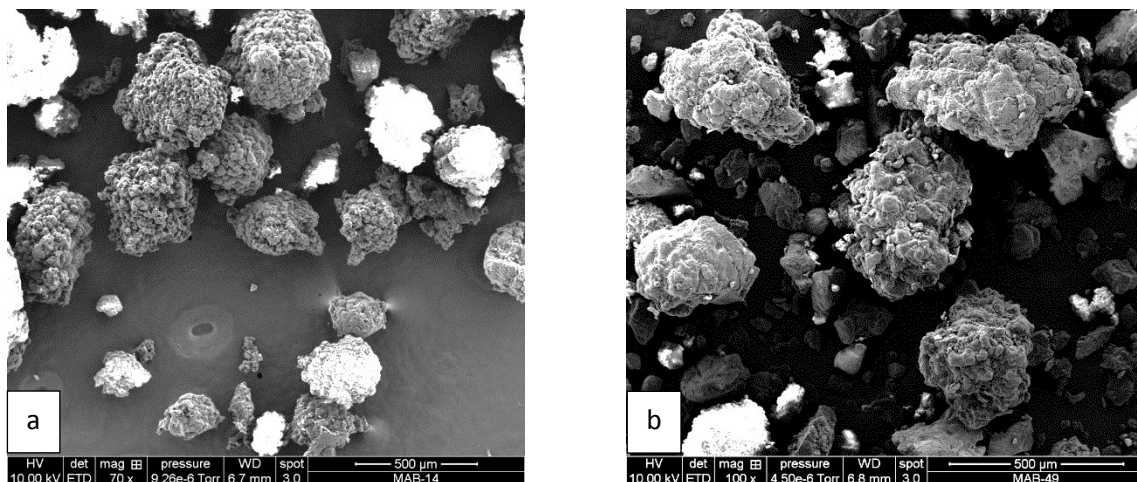

**Figure S11.** Comparison of polyethylene morphology produced in slurry (a) and gas phase (b) polymerizations using catalysts shown in Table 1.

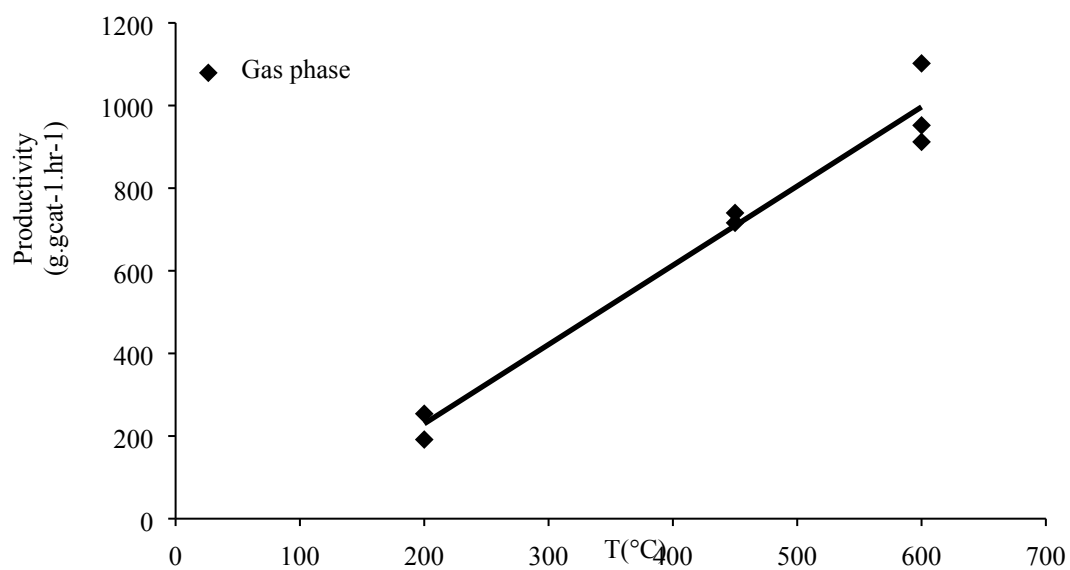

**Figure S12.** Comparison and reproducibility of catalysts average activity (or productivity) in gas phase homopolymerizations.
